# Supplementary material for: DNA hypomethylation of Synapsin II CpG islands associates with increased gene expression in bipolar disorder and major depression
Source: BMC Psychiatry. 2016 Aug 11;16:286. doi: 10.1186/s12888-016-0989-0 (PMC4982122; doi:10.1186/s12888-016-0989-0)
Supplement: Additional file 1: Table S1. — Diagnostic group statistics and comparisons. No difference between potential confounders. Normality of each variable was computed per each diagnostic group. When the data were normally distributed, unpaired Student’s T-tests were performed, and when at least one group was not normally distributed (Shapiro-Wilk p-value ≤0.05), non-parametric tests were performed. Differences in Gender were tested with Fisher’s Exact tests. (XLSX 12 kb) [file 12888_2016_989_MOESM1_ESM.xlsx]

## Sheet: Table S1
Additional file 1: Table S1. Diagnostic group statistics and comparisons. No difference between potential confunders. Normality of each variable was computed per each diagnostic group. When the data were normally distributed, unpaired Student's T-tests were performed, and when at least one group was not normally distributed (Shapiro-Wilk p-value ≤0.05), non-parametric tests were performed. Differ…
	Gender	Age	pH	PMD
CTRL (n=15)	12 male / 3 female	41.73	6.56	24.03
Std. Error of Mean		6.04	0.05	4.62
Shapiro-Wilk normality p-val		0.01	0.39	0.03
BD (n=13)	9 male / 4 female	44	6.63	30.38
Std. Error of Mean		4.05	0.07	6.31
Shapiro-Wilk normality p-val		0.23	0.23	0.17
MDD (n= 18)	11 male / 7 female	52	6.72	20.28
Std. Error of Mean		3.81	0.06	4.32
Shapiro-Wilk normality p-val		0.78	0.04	0.01
BD vs. CTRL	Chi-Sq	M-W	Unpaired	M-W
P value	0.6703	0.37	0.36	0.49
MDD vs. CTRL	Chi-Sq	M-W	M-W	M-W
P value	0.2828	0.09	0.06	0.36
