# Supplementary material for: DNA hypomethylation of Synapsin II CpG islands associates with increased gene expression in bipolar disorder and major depression
Source: BMC Psychiatry. 2016 Aug 11;16:286. doi: 10.1186/s12888-016-0989-0 (PMC4982122; doi:10.1186/s12888-016-0989-0)
Supplement: Additional file 2: Table S2. — Mixed Model ANOVA results for SYN1, SYN2, and SYN3 promoter CpG methylation. A. SYN1: Type III Tests of Fixed Effects. B. SYN2: Type III Tests of Fixed Effects. C. SYN3: Type III Tests of Fixed Effects. (XLSX 11 kb) [file 12888_2016_989_MOESM2_ESM.xlsx]

## Sheet: Table S2
Additional file 2: Table S2. Mixed Model ANOVA results for SYN1, SYN2, and SYN3 promoter CpG methylation.
A. SYN1: Type III Tests of Fixed Effects
Source	Numerator df	Denominator df	F	Significance
Intercept	1	165.57	305.911	1.81991e-39
Group	2	165.538	0.332103	0.71789
SYN1_CpG#	42	182.428	5.91187	1.01053e-17
Group * SYN1_CpG#	84	187.947	0.950996	0.597013
B. SYN2: Type III Tests of Fixed Effects
Source	Numerator df	Denominator df	F	Significance
Intercept	1	91.4943	635.271	5.9725e-43
Group	2	91.3621	4.12707	0.0192323
SYN2_CpG#	22	72.2554	69.5103	6.50782e-40
Group * SYN2_CpG#	44	74.5521	0.960249	0.55045
C. SYN3: Type III Tests of Fixed Effects
Source	Numerator df	Denominator df	F	Significance
Intercept	1	140.563	1315.14	3.1568e-73
Group	2	140.619	0.804581	0.449323
SYN3_CpG#	18	73.2191	44.7634	3.10855e-32
Group * SYN3_CpG#	36	74.3821	2.04117	0.00484445
