# Supplementary material for: DNA hypomethylation of Synapsin II CpG islands associates with increased gene expression in bipolar disorder and major depression
Source: BMC Psychiatry. 2016 Aug 11;16:286. doi: 10.1186/s12888-016-0989-0 (PMC4982122; doi:10.1186/s12888-016-0989-0)
Supplement: Additional file 3: Table S3. — Pairwise Comparisons for SYN2 CpG Methylation. (XLSX 15 kb) [file 12888_2016_989_MOESM3_ESM.xlsx]

## Sheet: Table S3
Additional file 3: Table S3. Pairwise Comparisons for SYN2 CpG Methylation
SYN2_CpG#	Status		Mean Difference (I-J)	Std. Error	df	Sig.c	95% Confidence Interval for Differencec
							Lower Bound	Upper Bound
CpG-2	Control	BD	0.0169062	0.0473612	26.6058	0.723936	-0.0803385	0.114151
chr3:12045925		MDD	-0.00337352	0.0420567	26.5848	0.936668	-0.0897298	0.0829827
CpG-3	Control	BD	0.055111	0.0400732	36.1218	0.177521	-0.0261516	0.136374
chr3:12045934		MDD	0.059	0.036111	36.1218	0.110978	-0.0142281	0.132228
CpG-4	Control	BD	0.0551109	0.0390225	37.2083	0.166175	-0.0239412	0.134163
chr3:12045943		MDD	0.0589999	0.0351642	37.2083	0.10176	-0.0122361	0.130236
CpG-11	Control	BD	0.0349627	0.0499569	25.819	0.490276	-0.0677603	0.137686
chr3:12045993		MDD	0.0138067	0.0443171	25.7917	0.757892	-0.0773242	0.104938
CpG-12.13.14	Control	BD	0.0417925	0.0779764	30.8295	0.59583	-0.117277	0.200862
chr3:12046001-12046005		MDD	0.0564265	0.0683491	30.8646	0.415388	-0.0829971	0.19585
CpG-15.16.17.18	Control	BD	0.11943	0.0972732	22.2198	0.23238	-0.082187	0.321046
chr3:12046042-12046055		MDD	.189*	0.0898693	22.3035	0.0469784	0.00275327	0.375214
CpG-19	Control	BD	.251*	0.117623	31.7757	0.0404428	0.0116418	0.490954
chr3:12046071		MDD	.266*	0.105993	31.7757	0.0174464	0.0498704	0.481792
CpG-20	Control	BD	0.20513	0.134152	32.5434	0.135907	-0.0679505	0.478211
chr3:12046086		MDD	0.189428	0.118557	32.4879	0.119775	-0.0519227	0.430778
CpG-37.38.39	Control	BD	0.00924297	0.037533	34.521	0.806938	-0.066991	0.0854769
chr3:12046185-12046193		MDD	0.0152192	0.0338221	34.521	0.65554	-0.0534774	0.0839157
CpG-41	Control	BD	0.0444251	0.0491768	27.5905	0.374147	-0.0563764	0.145227
chr3:12046204		MDD	0.0572515	0.0468285	27.6179	0.23182	-0.0387321	0.153235
CpG-60	Control	BD	0.0607742	0.0462073	31.0311	0.198061	-0.0334623	0.155011
chr3:12046306		MDD	0.0414857	0.0416408	31.0286	0.326823	-0.0434381	0.12641
CpG-62.63.64	Control	BD	-0.0976379	0.201322	23.6767	0.632146	-0.513448	0.318172
chr3:12046330-12046339		MDD	0.0436123	0.180377	23.6419	0.811032	-0.328966	0.41619
CpG-71	Control	BD	0.117605	0.107793	28.3764	0.284436	-0.103066	0.338277
chr3:12046379		MDD	0.102233	0.0974727	28.2958	0.303129	-0.0973367	0.301803
CpG-74	Control	BD	0.0134615	0.0306465	47.6209	0.662465	-0.04817	0.0750931
chr3:12046417		MDD	.062*	0.0285851	47.6209	0.0345204	0.00472547	0.119698
CpG-75.76	Control	BD	0.00717949	0.0184338	53.3671	0.698475	-0.029788	0.044147
chr3:12046421-12046424		MDD	.041*	0.0171939	53.3671	0.0196864	0.00686515	0.0758272
CpG-84	Control	BD	0.0134615	0.0314812	46.6963	0.670904	-0.0498814	0.0768045
chr3:12046478		MDD	.062*	0.0293637	46.6963	0.0394692	0.0031292	0.121294
CpG-85	Control	BD	-0.0105769	0.025887	36.0879	0.685262	-0.0630738	0.04192
chr3:12046495		MDD	-0.0193269	0.0241458	36.0879	0.428703	-0.0682928	0.0296389
CpG-88	Control	BD	0.0420513	0.035422	35.6433	0.24302	-0.0298129	0.113915
chr3:12046517		MDD	0.00163462	0.0330395	35.6433	0.960817	-0.0653959	0.0686651
CpG-89	Control	BD	-0.039359	0.0272205	36.097	0.156824	-0.0945596	0.0158416
chr3:12046546		MDD	-0.0208173	0.0253896	36.097	0.417646	-0.072305	0.0306704
CpG-90	Control	BD	-0.000705128	0.0353895	36.0035	0.984213	-0.0724781	0.0710679
chr3:12046554		MDD	0.0134615	0.0330091	36.0035	0.685826	-0.0534838	0.0804069
CpG-92.93.94.95.96.97	Control	BD	0.0101282	0.0629899	34.6899	0.873191	-0.117789	0.138045
chr3:12046578-12046592		MDD	-0.0734135	0.0587531	34.6899	0.219838	-0.192727	0.0458998
CpG-98	Control	BD	0.0215062	0.0412942	33.7108	0.605907	-0.0624401	0.105453
chr3:12046619		MDD	0.0519229	0.0386139	33.724	0.187707	-0.0265736	0.130419
CpG-99	Control	BD	-0.0285267	0.0870162	34.4985	0.74502	-0.205271	0.148217
chr3:12046627		MDD	0.00821651	0.0798193	34.4371	0.918609	-0.15392	0.170353
